# Supplementary material
Source: publisher figshare collection journal article supplement (https://acs.figshare.com/ndownloader/files/4104106)
Supplement: Supplementary file 1 [file 4104106]

# Supplemental Information

## Long Range Ordering of Symmetric Block-Copolymer Domains by Chaining of Superparamagnetic Nanoparticles in External Magnetic Fields

*Vinay Raman<sup>†</sup>, Arijit Bose<sup>‡</sup>, Bradley D. Olsen<sup>\*†</sup>, T. Alan Hatton<sup>\*†</sup>*

<sup>\*</sup>, <sup>†</sup> Department of Chemical Engineering, Massachusetts Institute of Technology

Cambridge, MA – 02139

<sup>‡</sup>Department of Chemical Engineering, University of Rhode Island

Kingston, RI – 02881

Corresponding Author:

T. Alan Hatton

Department of Chemical Engineering, Massachusetts Institute of Technology

77 Massachusetts Avenue, Cambridge, MA - 02139

(Tel.): 1-617-253-4588

(Email): [tahatton@mit.edu](mailto:tahatton@mit.edu)

Bradley D. Olsen

Department of Chemical Engineering, Massachusetts Institute of Technology

77 Massachusetts Avenue, Cambridge, MA - 02139

(Tel.): 1-617-715-4548

(Email): [bdolsen@mit.edu](mailto:bdolsen@mit.edu)

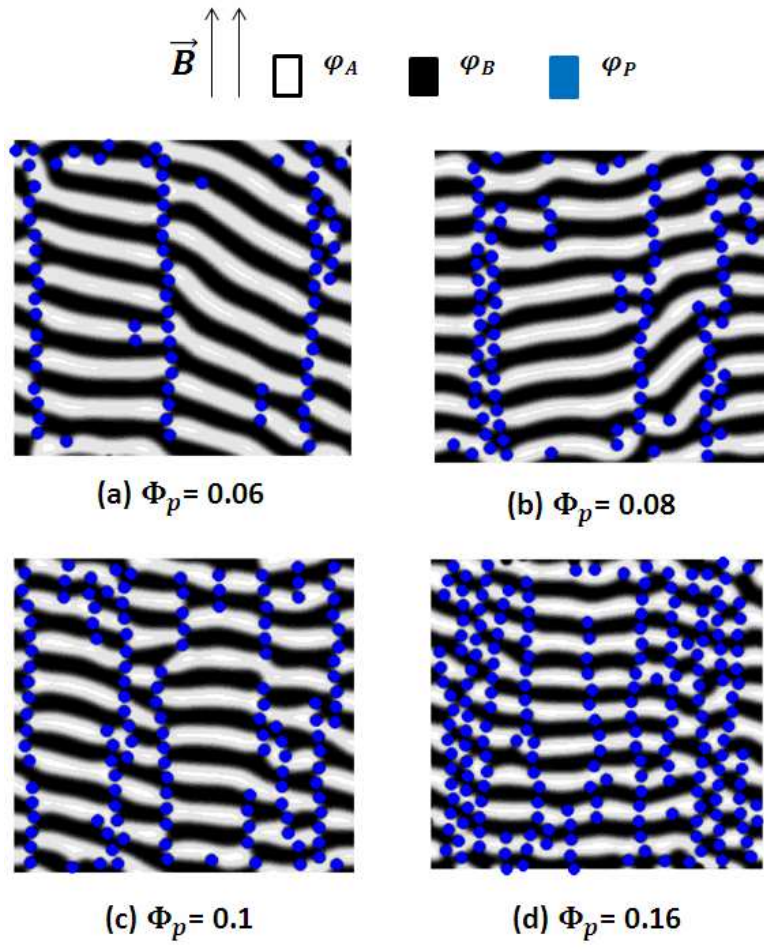

**Figure S1.** Effect of neutral nanoparticles on BCP alignment,  $\lambda = 9$ ,  $L = 32R_g$ ,  $\chi_{BP}N=0$ ,  $\chi_{AP}N=0$ ,  $\chi_{AB}N=20$ ,  $R_P = 0.51R_g$ ; (a)  $\Phi_p=0.06$ , (b)  $\Phi_p=0.08$ , (c)  $\Phi_p=0.1$ , (d)  $\Phi_p=0.16$
